# Supplementary material for: Effect of a Multicomponent Intervention Delivered on a Web-Based Platform on Hypertension Control: A Cluster Randomized Clinical Trial
Source: PubMed Central journal article supplement (PMC9856259; doi:10.1001/jamanetworkopen.2022.45439), 2022-12-07

## Supplemental Online Content

Zhou H, Wang X, Yang Y, et al. Effect of a multicomponent intervention delivered on a web-based platform on hypertension control: a cluster randomized clinical trial. *JAMA Netw Open*. 2022;5(12):e2245439. doi:10.1001/jamanetworkopen.2022.45439

**eTable 1.** Baseline Characteristics for All Participants Enrolled in the Study

**eTable 2.** Comparison of Follow-up and Lost to Follow-up Patients

**eTable 3.** Changes From Baseline for BP Control Rate, BP Levels and Lifestyle Factors

**eTable 4.** Hypertension Control at Baseline and Follow-up

**eTable 5.** Newly Initiated Antihypertensive Medication

**eTable 6.** Adverse Events in the Study

**eTable 7.** Sensitivity Analysis for Primary and Secondary Outcomes After Imputing the Missing Data in the Study

**eFigure 1.** CONSORT Flow Diagram

**eFigure 2.** Overview of the Web-Based Platform

**eFigure 3.** Subgroup Analysis for Change in Blood Pressure at 12 Months

**eFigure 4.** Mean Change in Lifestyle Factors Over Time

This supplemental material has been provided by the authors to give readers additional information about their work.

**eTable 1. Baseline Characteristics for All Participants Enrolled in the Study**

|                             | <b>Total (4,709)</b> | <b>Control (1,570)</b> | <b>Intervention (3,139)</b> | <b>P value</b> |
|-----------------------------|----------------------|------------------------|-----------------------------|----------------|
| Age, mean(SD), y            | 61.5(9.4)            | 61.2(9.7)              | 61.5(9.4)                   | .52            |
| Sex, male, No.(%)           | 2,136(45.4)          | 747(47.6)              | 1,389(44.2)                 | .03            |
| smoking, No.(%)             | 716(15.2)            | 226(14.4)              | 490(15.6)                   | .28            |
| drinking, No.(%)            | 841(17.9)            | 279(17.8)              | 562(17.9)                   | .91            |
| BMI group, No.(%)           |                      |                        |                             | .24            |
| normal                      | 1,316(28.0)          | 409(26.1)              | 907(28.9)                   |                |
| overweight                  | 2,052(43.6)          | 699(44.5)              | 1,353(43.1)                 |                |
| obesity                     | 1,260(26.8)          | 434(27.6)              | 826(26.3)                   |                |
| SBP, mean(SD), mmHg         | 148.6(18.5)          | 147.5(17.7)            | 148.6(18.5)                 | .12            |
| DBP, mean(SD), mmHg         | 85.0(11.4)           | 85.8(11.5)             | 85.0(11.4)                  | .002           |
| BP control, No.(%)          | 1430(30.4)           | 358(22.8)              | 753(24.0)                   | .37            |
| CVD family history          |                      |                        |                             | .79            |
| no                          | 2,891(61.4)          | 968(61.7)              | 1,923(61.3)                 |                |
| yes                         | 1,818(38.6)          | 602(38.3)              | 1,216(38.7)                 |                |
| Antihypertensive medication | 3,007(63.9)          | 991(63.1)              | 2,016(64.2)                 | .41            |
| Region, No.(%)              |                      |                        |                             | .24            |
| west                        | 1,331(28.3)          | 450(28.7)              | 881(28.1)                   |                |
| central                     | 1,140(24.2)          | 399(25.4)              | 741(23.6)                   |                |
| east                        | 2,238(47.5)          | 721(45.9)              | 1517(48.3)                  |                |

Abbreviations: BMI, Body Mass Index; SBP, systolic Blood Pressure; CVD, cardiovascular disease; SD, standard deviations.

| <b>eTable 2. Comparison of Follow-up and Lost to Follow-up Patients</b>                                                                                                     |                              |                                    |                |
|-----------------------------------------------------------------------------------------------------------------------------------------------------------------------------|------------------------------|------------------------------------|----------------|
|                                                                                                                                                                             | <b>Follow-up<br/>(4,198)</b> | <b>Lost of follow-up<br/>(511)</b> | <b>P value</b> |
| Age group, No.(%)                                                                                                                                                           |                              |                                    | .13            |
| <65                                                                                                                                                                         | 2,457(58.5)                  | 317(62.0)                          |                |
| ≥65                                                                                                                                                                         | 1,741(41.5)                  | 194(38.0)                          |                |
| Sex, No.(%)                                                                                                                                                                 |                              |                                    | .15            |
| Male                                                                                                                                                                        | 1,889(45.0)                  | 247(48.3)                          |                |
| Female                                                                                                                                                                      | 2,309(55.0)                  | 264(51.7)                          |                |
| BMI mean(SD), Kg/m <sup>2</sup>                                                                                                                                             | 26.0(3.5)                    | 26.1(3.3)                          | .66            |
| BP mean(SD), mm Hg                                                                                                                                                          |                              |                                    |                |
| SBP                                                                                                                                                                         | 148.4(18.4)                  | 146.9(17.3)                        | .13            |
| DBP                                                                                                                                                                         | 85.2(11.4)                   | 85.8(11.9)                         | .18            |
| BP control, No.(%)                                                                                                                                                          | 978(23.3)                    | 133(26.0)                          | .17            |
| Antihypertensive medication, No. (%)                                                                                                                                        | 2,684(63.9)                  | 323(63.2)                          | .64            |
| Abbreviations: BMI, body mass index; BP, blood pressure; SBP, systolic blood pressure; DBP, diastolic blood pressure; SD, standard deviations; CVD, cardiovascular disease. |                              |                                    |                |

| eTable 3. Changes from baseline for BP control rate, BP levels and Lifestyle factors |              |                      |                       |                       |                       |
|--------------------------------------------------------------------------------------|--------------|----------------------|-----------------------|-----------------------|-----------------------|
|                                                                                      | Group        | Months               |                       |                       |                       |
|                                                                                      |              | 3                    | 6                     | 9                     | 12                    |
| BP control rate<br>(%,95%CI)                                                         | intervention | 20.9(18.7-23.2)      | 27.3(25.1-29.4)       | 30.6(28.3-32.8)       | 24.6(22.3-26.9)       |
|                                                                                      | control      | -                    | -                     | -                     | 7.7(3.9-11.4)         |
| SBP<br>(mm, 95%CI)                                                                   | intervention | -10.7(-11.5 to -9.9) | -13.6(-14.4 to -12.8) | -14.1(-14.9 to -13.3) | -12.0(-12.8 to -11.1) |
|                                                                                      | control      | -                    | -                     | -                     | -1.9(-3.3 to -0.5)    |
| DBP<br>(mm, 95%CI)                                                                   | intervention | -2.8(-3.3 to -2.3)   | -4.4(-4.9 to -3.9)    | -4.8(-5.3 to -4.3)    | -4.0(-4.6 to -3.5)    |
|                                                                                      | control      | -                    | -                     | -                     | -2.2(-3.1 to -1.4)    |
| regular exercise<br>(%,95%CI)                                                        | intervention | 12.2(9.8-14.7)       | 13.5(11.1-15.9)       | 15.4(13.0-17.8)       | 14.4(11.9-16.9)       |
|                                                                                      | control      | -                    | -                     | -                     | 14.1(9.8-18.5)        |
| Smoking<br>(%,95%CI)                                                                 | intervention | 0.6(-1.2-2.4)        | -1.8(-3.6 to -0.1)    | -2.6(-4.3 to -0.9)    | -1.2(-3.0 to 0.6)     |
|                                                                                      | control      | -                    | -                     | -                     | 0.4(-2.7 to 3.6)      |
| Drinking<br>(%,95%CI)                                                                | intervention | 0.7(-1.2 - 2.7)      | -0.2(-2.1 - 1.6)      | -2.2(-4.1 to -0.4)    | -2.1(-4.0 to -0.2)    |
|                                                                                      | control      | -                    | -                     | -                     | 2.1(-1.3 to 5.5)      |
| Obesity<br>(%,95%CI)                                                                 | intervention | -4.8(-7.1 to -2.6)   | -7.6(-9.8 to -5.3)    | -8.0(-10.3 to -5.8)   | -5.3(-7.7 to -3.0)    |
|                                                                                      | control      | -                    | -                     | -                     | -4.4(-8.2 to -0.5)    |

Abbreviations: BP, blood pressure

| <b>eTable 4. Hypertension Control at Baseline and Follow-up</b> |                  |                              |                                   |                            |                       |
|-----------------------------------------------------------------|------------------|------------------------------|-----------------------------------|----------------------------|-----------------------|
| <b>Baseline</b>                                                 | <b>12 months</b> | <b>Control Group (1,133)</b> | <b>Intervention Group (2,985)</b> | <b>Intervention Effect</b> | <b><i>P</i> value</b> |
| uncontrolled                                                    | uncontrolled     | 679(59.9)                    | 1425(47.7)                        | -                          |                       |
| uncontrolled                                                    | controlled       | 199(17.6)                    | 879(29.5)                         | 1.17(1.13-1.21)            | <.001                 |
| controlled                                                      | uncontrolled     | 112(9.9)                     | 145(4.9)                          | -                          |                       |
| controlled                                                      | controlled       | 143(12.6)                    | 536(18.0)                         | -                          |                       |
| Data were presented as NO.(%).                                  |                  |                              |                                   |                            |                       |

| <b>eTable 5. Newly Initiated Antihypertensive Medication</b>                                                                                                                                                                              |                    |                     |                           |                |
|-------------------------------------------------------------------------------------------------------------------------------------------------------------------------------------------------------------------------------------------|--------------------|---------------------|---------------------------|----------------|
|                                                                                                                                                                                                                                           | <b>Total (425)</b> | <b>Control (88)</b> | <b>Intervention (337)</b> | <b>P value</b> |
| Number of antihypertensive medication*, No.(%)                                                                                                                                                                                            |                    |                     |                           | .15            |
| 1                                                                                                                                                                                                                                         | 317(74.6)          | 68(77.3)            | 249(73.9)                 |                |
| 2                                                                                                                                                                                                                                         | 94(22.1)           | 20(22.7)            | 74(22.0)                  |                |
| >2                                                                                                                                                                                                                                        | 14(3.3)            | 0                   | 14(4.2)                   |                |
| Drug Type for Monotherapy, No.(%)                                                                                                                                                                                                         |                    |                     |                           | .04            |
| ACEI                                                                                                                                                                                                                                      | 71(22.4)           | 15(22.1)            | 56(22.5)                  |                |
| ARB                                                                                                                                                                                                                                       | 68(21.5)           | 11(16.2)            | 57(22.9)                  |                |
| CCB                                                                                                                                                                                                                                       | 144(45.4)          | 31(45.6)            | 113(45.4)                 |                |
| β-blockers                                                                                                                                                                                                                                | 4(1.3)             | 3(4.4)              | 1(0.4)                    |                |
| Diuretics                                                                                                                                                                                                                                 | 21(6.6)            | 5(7.4)              | 16(6.4)                   |                |
| other                                                                                                                                                                                                                                     | 9(2.8)             | 3(4.4)              | 6(2.4)                    |                |
| Abbreviations: ACEI, angiotensin converting enzyme inhibitor; ARB, angiotensin receptor antagonist; CCB, calcium channel blocker; Other, traditional Chinese medicine.                                                                    |                    |                     |                           |                |
| * "1" for one drug of monotherapy; "2" for two drugs free combinations or single-pill combination consisted of two active ingredients; ">2" for >2 drugs free combinations or single-pill combination consisted of >2 active ingredients. |                    |                     |                           |                |

| <b>eTable 6. Adverse Events in the Study</b>                                                                                             |                             |                        |
|------------------------------------------------------------------------------------------------------------------------------------------|-----------------------------|------------------------|
| <b>Adverse Event [No. (%)]</b>                                                                                                           | <b>Intervention (2,985)</b> | <b>Control (1,133)</b> |
| CVD Event                                                                                                                                |                             |                        |
| AMI                                                                                                                                      | NA                          | 2(0.2)                 |
| CABG                                                                                                                                     | 4(0.1)                      | 2(0.2)                 |
| Stroke                                                                                                                                   | 12(0.4)                     | 3(0.3)                 |
| Death                                                                                                                                    | 13(0.4)                     | 6(0.5)                 |
| Adverse Effect                                                                                                                           |                             |                        |
| Cough                                                                                                                                    | 9(0.3)                      | NA                     |
| Stomach discomfort                                                                                                                       | 3(0.1)                      | 1(0.1)                 |
| Edema                                                                                                                                    | 3(0.1)                      | NA                     |
| Dizziness                                                                                                                                | 1(0)                        | 1(0.1)                 |
| Other                                                                                                                                    | 10(0.3)                     | 2(0.2)                 |
| Abbreviations: AMI, acute myocardial infraction; CABG, coronary artery bypass graft; CVD, cardiovascular disease; NA, no data available. |                             |                        |

**eTable 7. Sensitivity Analysis for Primary and Secondary Outcomes After Imputing the Missing Data in the Study**

|                       | Control     |             |                                 | Intervention |             |                                    | Intervention effect(OR (95%CI)) <sup>a</sup> | P value |
|-----------------------|-------------|-------------|---------------------------------|--------------|-------------|------------------------------------|----------------------------------------------|---------|
|                       | baseline    | 12 Month    | Change from baseline            | baseline     | 12 Month    | Change from baseline               |                                              |         |
| Mean SBP (SD), mm Hg  | 147.5(18.0) | 145.5(18.0) | -2.0(-3.4 to -0.6) <sup>b</sup> | 148.7(18.5)  | 137.0(13.5) | -11.8(-12.6 to -10.9) <sup>b</sup> | -9.7(-11.4 to -8.1)                          | <.001   |
| Mean DBP (SD), mm Hg  | 85.5(11.3)  | 83.3(11.1)  | -2.2(-3.1 to -1.4) <sup>b</sup> | 85.0(11.5)   | 81.1(8.9)   | -3.9(-4.4 to -3.4) <sup>b</sup>    | -1.7(-2.7 to -0.7)                           | .001    |
| BP control (%)        | 22.6        | 30.2        | 7.6(3.8-11.3) <sup>b</sup>      | 23.3         | 47.3        | 24.0(21.7-26.3) <sup>b</sup>       | 1.18(1.13-1.23)                              | <.001   |
| BP classification (%) |             |             |                                 |              |             |                                    |                                              |         |
| Stage 1 hypertension  | 42.7        | 42.1        | -0.6(-4.5-3.3)                  | 39.0         | 27.4        | -11.6(-14.0 to -9.2) <sup>b</sup>  | 0.90(0.86-0.94)                              | <.001   |
| Stage 2 hypertension  | 22.6        | 16.3        | -6.4(-9.3 to -3.4) <sup>b</sup> | 23.3         | 6.6         | -16.7(-18.5 to -14.9) <sup>b</sup> | 0.90(0.87-0.93)                              | <.001   |
| Stage 3 hypertension  | 6.0         | 5.8         | -0.2(-1.9-1.5)                  | 7.1          | 1.1         | -6.0(-7.0 to -4.9) <sup>b</sup>    | 0.94(0.93-0.96)                              | <.001   |
| Lifestyle factors (%) |             |             |                                 |              |             |                                    |                                              |         |
| Current smoking       | 14.2        | 14.9        | 0.7(-2.2-3.6)                   | 15.7         | 14.6        | -1.1(-2.9-0.7)                     | 0.98(0.95-1.02)                              | .30     |
| Current drinking      | 17.0        | 18.7        | 1.7(-1.4-4.8)                   | 18.0         | 16.2        | -1.8(-3.7-0.1)                     | 0.96(0.93-1.00)                              | .05     |
| Overweight/Obesity    | 73.4        | 70.1        | -3.3(-7.1-0.5)                  | 70.8         | 67.3        | -3.5(-5.8 to -1.2) <sup>b</sup>    | 1.00(0.95-1.04)                              | .92     |
| Regular exercise      | 42.5        | 56.3        | 13.8(9.8-17.9) <sup>b</sup>     | 45.2         | 59.8        | 14.7(12.2-17.1) <sup>b</sup>       | 1.01(0.96-1.06)                              | .73     |

Abbreviations: SBP, systolic blood pressure; DBP, diastolic blood pressure; OR, odds ratio. Data were presented as mean(SD) for continuous outcomes; proportion for dichotomous outcomes.

<sup>a</sup> Data were presented as mean(95%CI) for continuous outcomes, and OR(95%CI) for dichotomous outcomes.

<sup>b</sup> P<0.05.



eFigure 1 CONSORT Flow Diagram

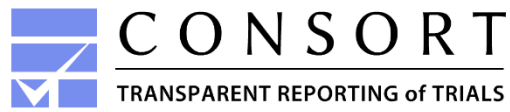

CONSORT 2010 Flow Diagram

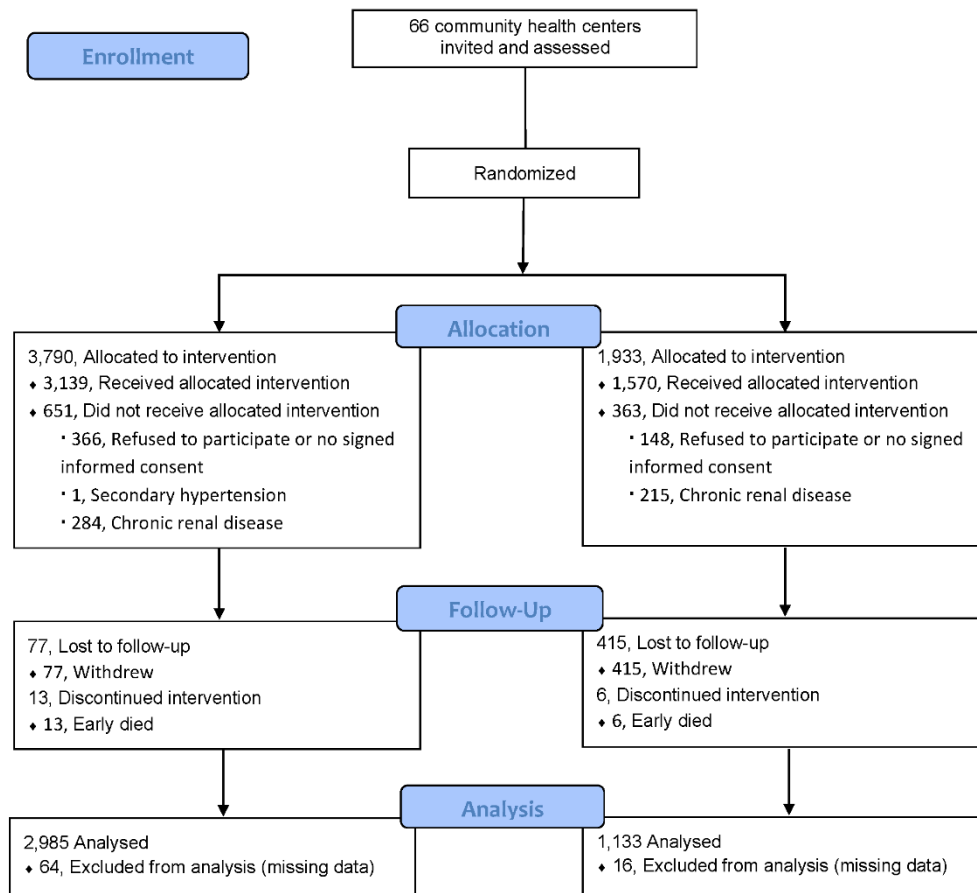

eFigure 2 Overview of the Web-based platform

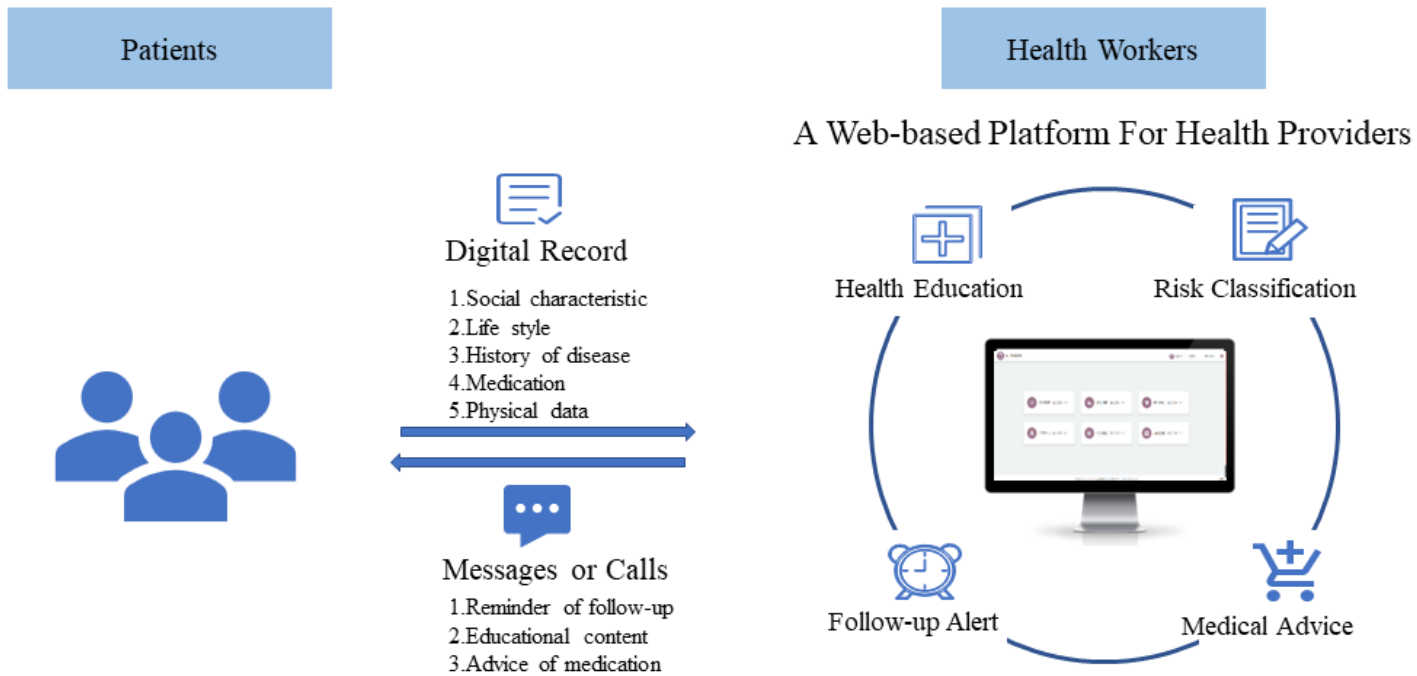

### eFigure 3 Subgroup Analysis for Change in Blood Pressure at 12 Months

#### A. Mean change in systolic blood pressure

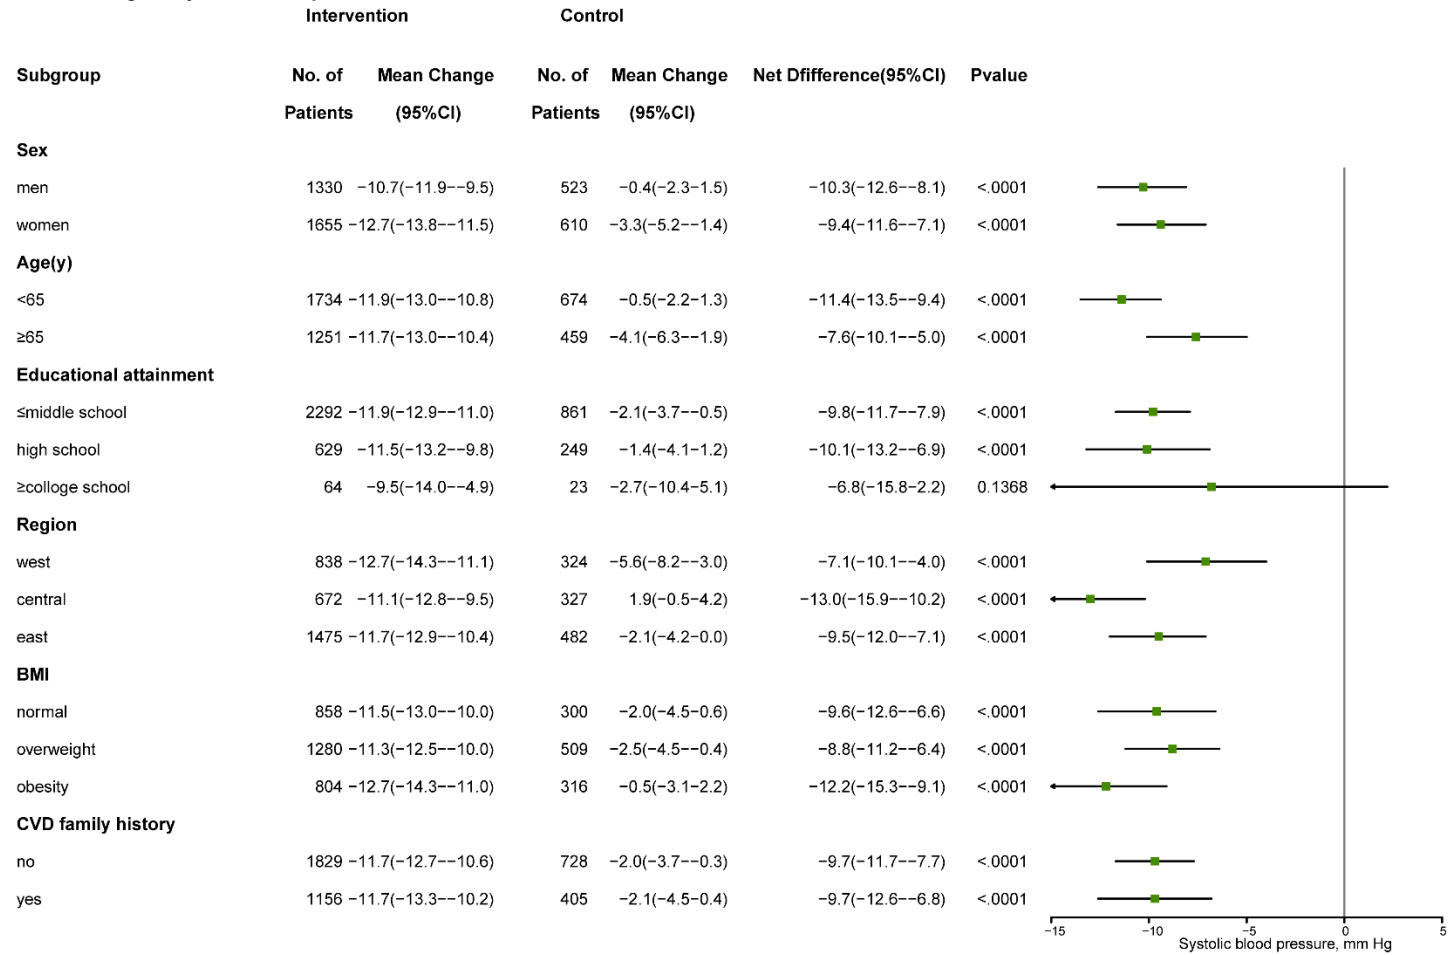

**B. Mean change in diastolic blood pressure**

| Subgroup                      | Intervention    |                     | Control         |                     | Net Difference(95%CI) | Pvalue |
|-------------------------------|-----------------|---------------------|-----------------|---------------------|-----------------------|--------|
|                               | No. of Patients | Mean Change (95%CI) | No. of Patients | Mean Change (95%CI) |                       |        |
| <b>Sex</b>                    |                 |                     |                 |                     |                       |        |
| men                           | 1330            | -5.1(-5.9--4.3)     | 523             | -1.5(-2.7--0.2)     | -3.6(-5.1--2.1)       | <.0001 |
| women                         | 1655            | -3.0(-3.7--2.3)     | 610             | -2.9(-4.1--1.7)     | -0.1(-1.5--1.2)       | 0.8395 |
| <b>Age(y)</b>                 |                 |                     |                 |                     |                       |        |
| <65                           | 1734            | -5.0(-5.7--4.4)     | 674             | -1.4(-2.5--0.3)     | -3.7(-4.9--2.4)       | <.0001 |
| ≥65                           | 1251            | -2.4(-3.2--1.6)     | 459             | -3.5(-4.8--2.2)     | 1.1(-0.4--2.6)        | 0.148  |
| <b>Educational attainment</b> |                 |                     |                 |                     |                       |        |
| ≤middle school                | 2292            | -3.5(-4.1--2.9)     | 861             | -2.9(-3.9--1.9)     | -0.7(-1.8--0.5)       | 0.2633 |
| high school                   | 629             | -5.2(-6.4--4.1)     | 249             | -0.2(-2.0--1.7)     | -5.1(-7.3--2.9)       | <.0001 |
| ≥colloge school               | 64              | -6.3(-9.6--3.1)     | 23              | -1.1(-6.7--4.5)     | -5.3(-11.8--1.2)      | 0.1112 |
| <b>Region</b>                 |                 |                     |                 |                     |                       |        |
| west                          | 838             | -4.2(-5.2--3.1)     | 324             | 0.1(-1.6--1.8)      | -4.3(-6.2--2.3)       | <.0001 |
| central                       | 672             | -4.3(-5.4--3.3)     | 327             | -3.6(-5.2--2.1)     | -0.7(-2.6--1.1)       | 0.4483 |
| east                          | 1475            | -3.7(-4.4--2.9)     | 482             | -2.9(-4.2--1.6)     | -0.8(-2.3--0.7)       | 0.3119 |
| <b>BMI</b>                    |                 |                     |                 |                     |                       |        |
| normal                        | 858             | -3.5(-4.4--2.6)     | 300             | -2.2(-3.7--0.6)     | -1.4(-3.2--0.5)       | 0.1461 |
| overweight                    | 1280            | -3.7(-4.5--2.9)     | 509             | -2.2(-3.5--1.0)     | -1.4(-2.9--0.1)       | 0.0617 |
| obesity                       | 804             | -4.6(-5.6--3.5)     | 316             | -1.8(-3.5--0.1)     | -2.8(-4.8--0.8)       | 0.0069 |
| <b>CVD family history</b>     |                 |                     |                 |                     |                       |        |
| no                            | 1829            | -3.5(-4.2--2.9)     | 728             | -2.0(-3.0--0.9)     | -1.6(-2.8--0.4)       | 0.0111 |
| yes                           | 1156            | -4.0(-5.0--3.1)     | 405             | -2.8(-4.4--1.2)     | -1.2(-3.1--0.6)       | 0.192  |

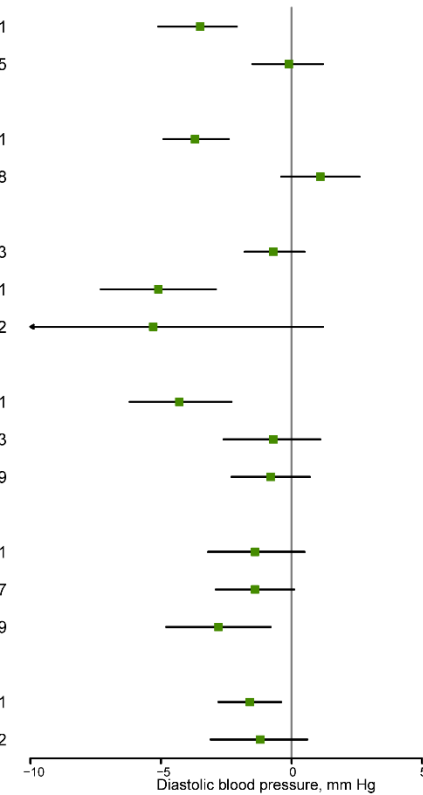

**eFigure 4 Mean Change in Lifestyle Factors over Time**

**A Smoking**

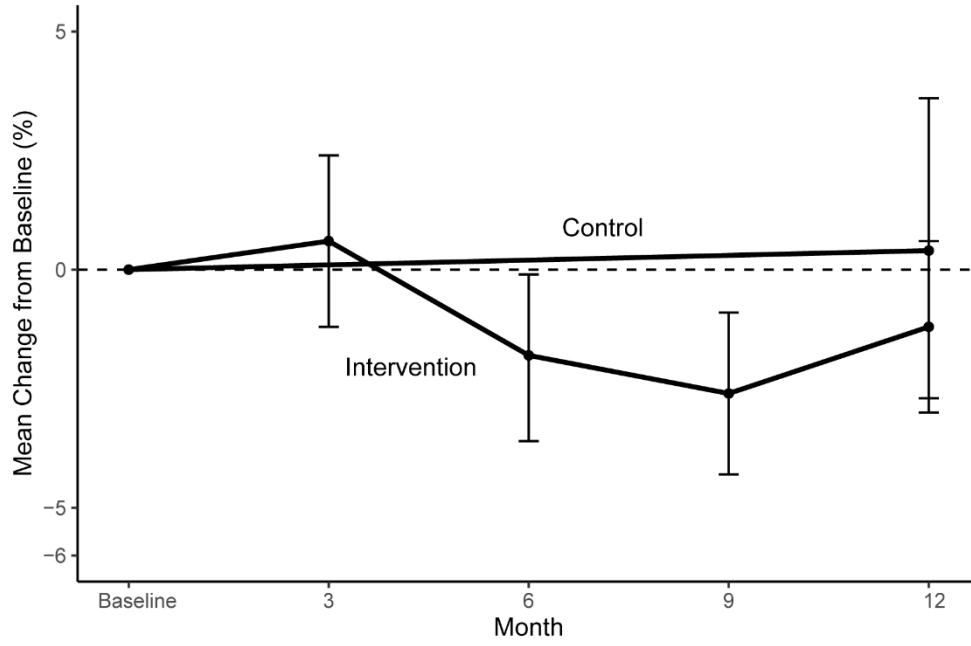

**B Drinking**

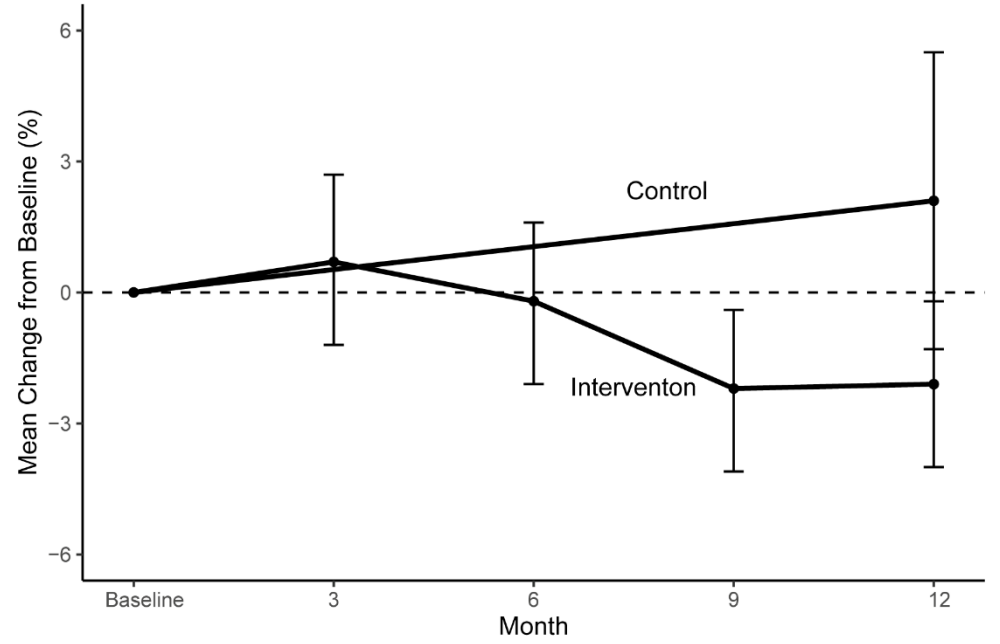

**C Oversity/Obesity**

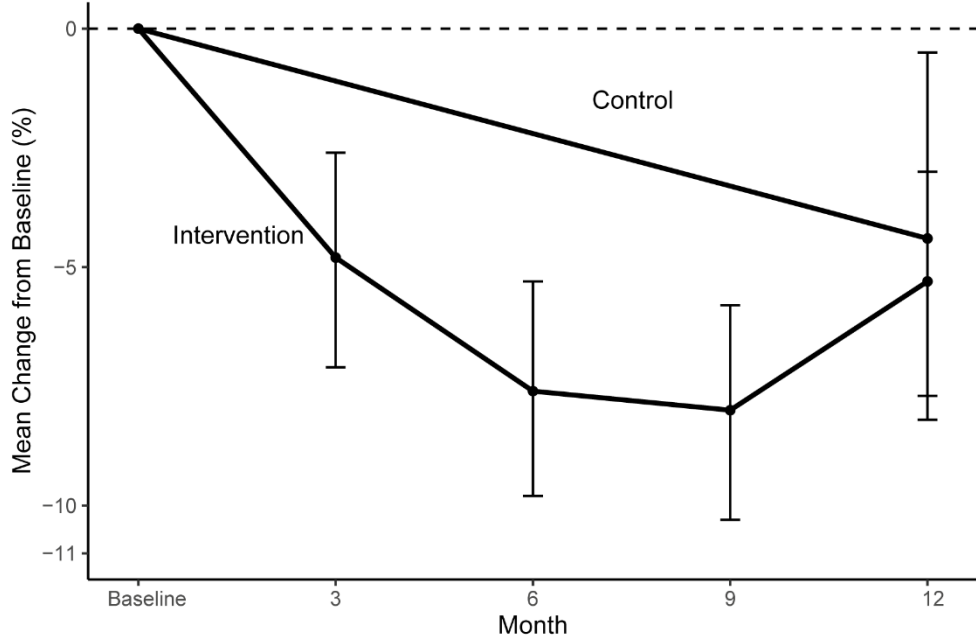

**D Regular exercise**

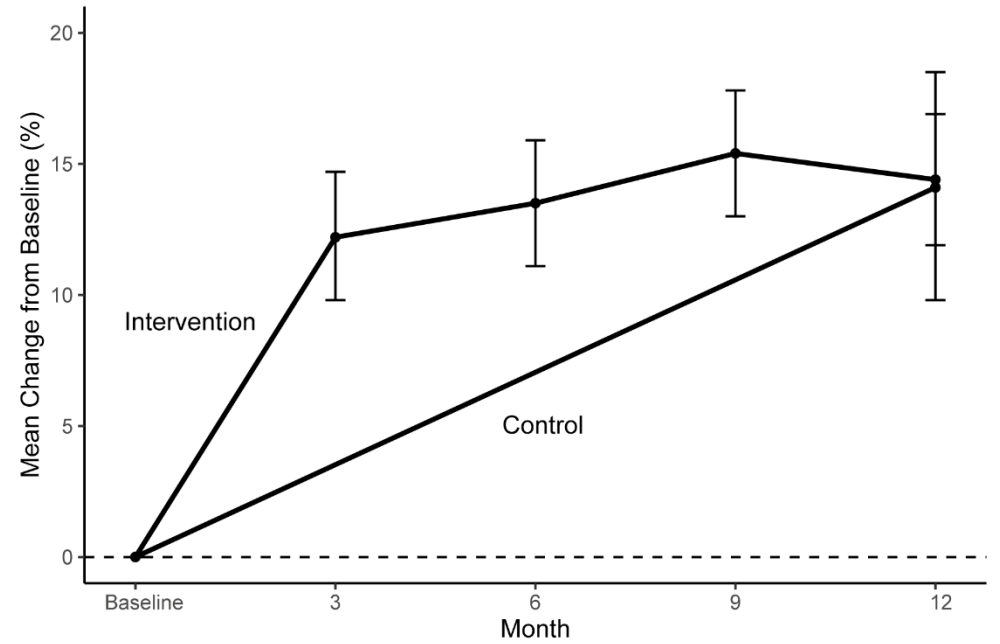

Supplement: jamanetwopen-e2245439-s002.pdf [file jamanetwopen-e2245439-s002.pdf]
