# Supplementary material for: Effect of a Multicomponent Intervention Delivered on a Web-Based Platform on Hypertension Control: A Cluster Randomized Clinical Trial
Source: PubMed Central journal article supplement (PMC9856259; doi:10.1001/jamanetworkopen.2022.45439), 2022-12-07
Supplement: jamanetwopen-e2245439-s003.pdf [file jamanetwopen-e2245439-s003.pdf]

## Data Sharing Statement

Zhou. Effect of a Multicomponent Intervention Delivered on a Web-Based Platform on Hypertension Control. *JAMA Netw Open*. Published December 07, 2022.

doi:10.1001/jamanetworkopen.2022.45439

### Data

**Data available:** Yes

**Data types:** Deidentified participant data

**How to access data:** [wangznegwu@foxmail.com](mailto:wangznegwu@foxmail.com)

**When available:** With publication

### Supporting Documents

**Document types:** Informed consent form

**How to access documents:** [wangznegwu@foxmail.com](mailto:wangznegwu@foxmail.com)

**When available:** With publication

### Additional Information

**Who can access the data:** Zengwu Wang

**Types of analyses:** For results verification

**Mechanisms of data availability:** with investigator support AND with assigned data access agreement
